# Supplementary material
Source: ML conference proceedings conference paper supplement (https://proceedings.neurips.cc/paper_files/paper/2007/hash/c0e190d8267e36708f955d7ab048990d-Abstract.html)

# Learning with Transformation Invariant Kernels

Christian Walder<sup>1</sup> and Olivier Chapelle<sup>2</sup> - Poster M40

Gaussian kernel SVM:

**TWO PARAMETERS:** length scale & noise parameter

Thin-plate kernel SVM: (new)

**ONE PARAMETER:** length scale = noise parameter

The joy of invariance - only one free parameter!

They perform equally well in practice!

We also derive basic results for  
invariant and *conditionally positive definite* kernels.

<sup>1</sup> Max Planck Institute, Tübingen, Germany.

<sup>2</sup> Yahoo! Research, Santa Clara, CA.

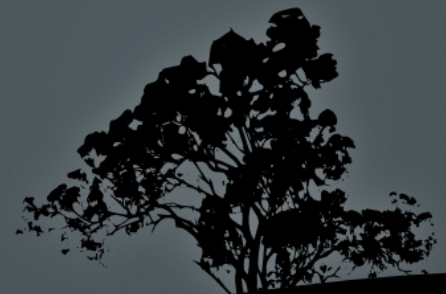

Supplement: Supplementary file 3 [file c0e190d8267e36708f955d7ab048990d-Supplemental.zip]
